# Supplementary material for: Alterations in the immune system persist after one year of convalescence in severe COVID-19 patients
Source: Frontiers journal article supplement (doi:10.3389/fimmu.2023.1127352), 2023-02-13

# Supplementary file 1: gating strategy for NK<sup>bright</sup>, NK<sup>dim</sup>, NKT and CD19 expression

See "Note" and page 3 analysis for NK<sup>bright</sup>

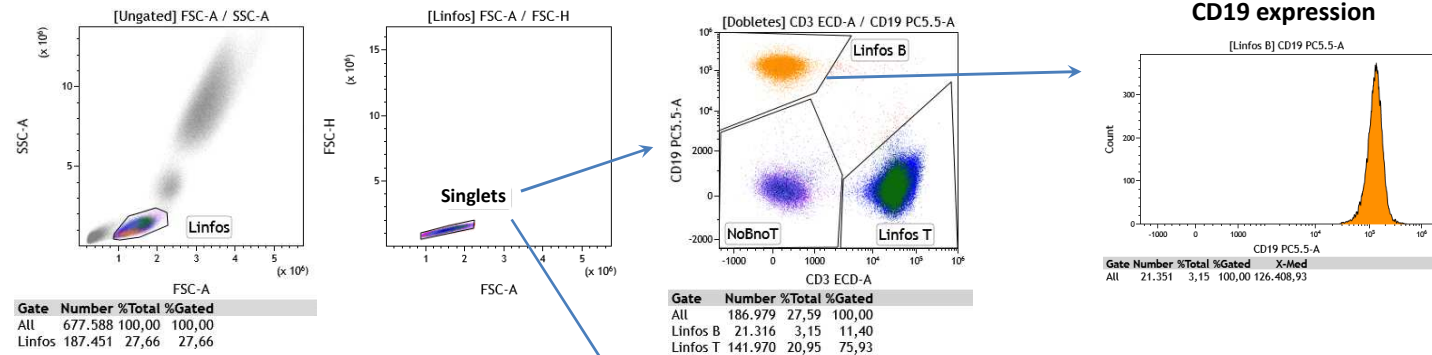

## NK<sup>bright</sup> analysis

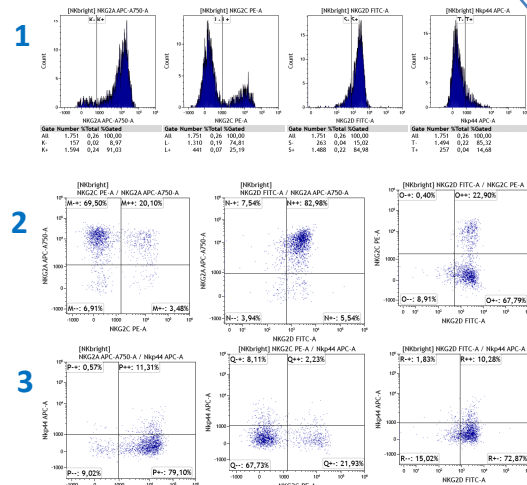

## NKT analysis

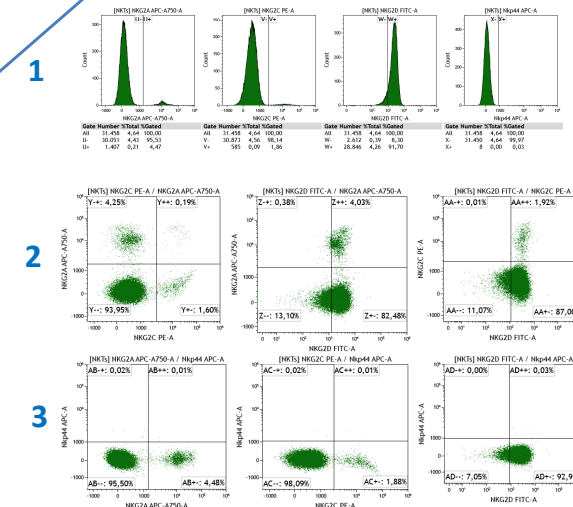

## NK<sup>dim</sup> analysis

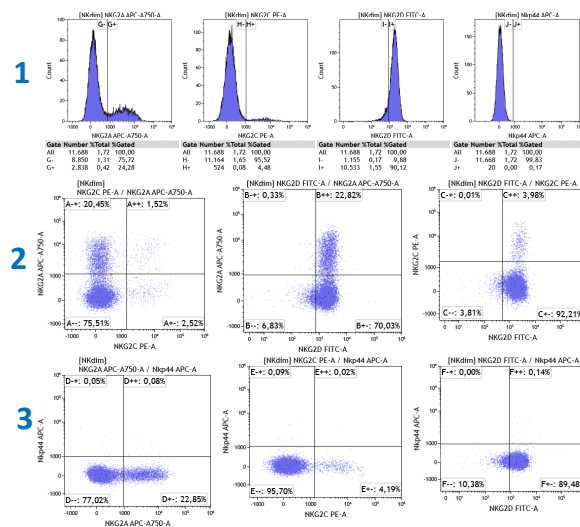

## Analysis of the NK<sup>bright</sup>, NK<sup>dim</sup> and NKT populations

Three analyses were performed in every population:

1. Percentage of cells that express NKG2A, NKG2C, NKG2D or Nkp44.
2. Percentage of cells that express combinations of NKG2A, NKG2C and NKG2D
3. Expression of Nkp44 in NKG2A<sup>+</sup>, NKG2C<sup>+</sup> or NKG2D<sup>+</sup> populations

NOTE: A specific gating strategy for the expression of Nkp44 in NK<sup>bright</sup> was designed (see page 3) after differences in this analysis were detected.

The analysis presented in the paper for NK<sup>bright</sup> populations is the one detailed in the next page. Both strategies rendered the same differences.

# Supplementary file 1: autofluorescence control for NK<sup>bright</sup>, NK<sup>dim</sup>, NKT and CD19 expression

Autofluorescence determination obtained with a blood sample unstained and processed as the stained blood sample

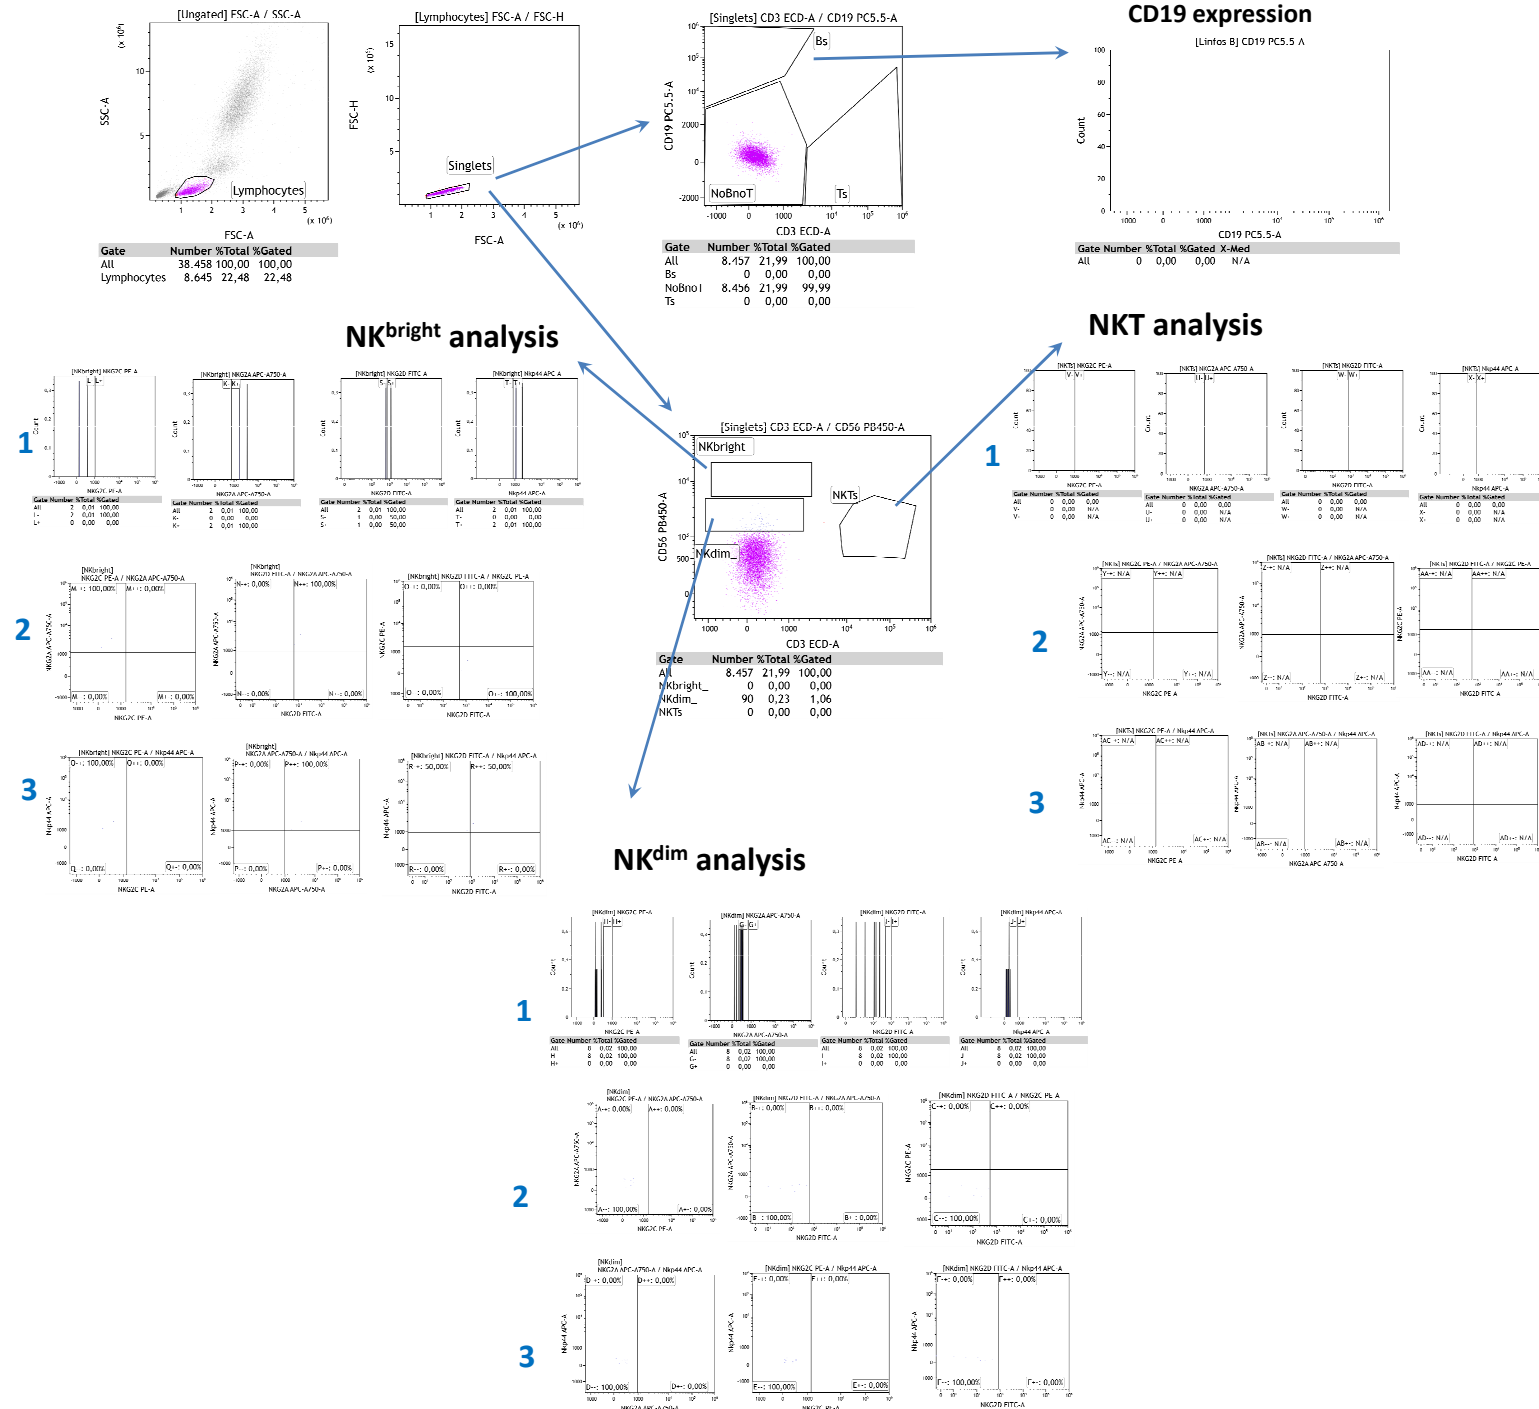

**Supplementary file 1: gating strategy for the expression of NKp44 in NK<sup>bright</sup> subpopulations**  
Data presented in the paper

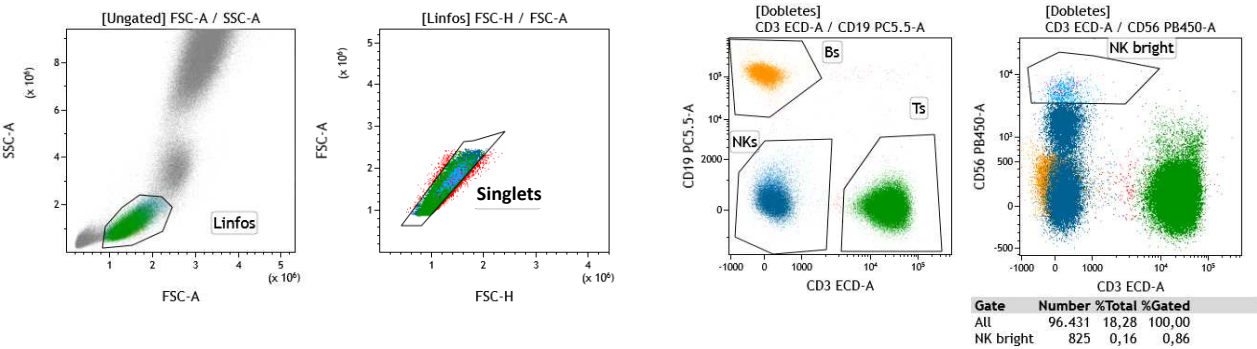

**Analysis of NKp44 in the NK<sup>bright</sup> subpopulations:**

Once the NK<sup>bright</sup> population was gated, plots for NKG2C, NKG2A and NKG2D were created and positive populations selected (1). NKp44 intensity was represented in a histogram for each subpopulation and NKp44<sup>+</sup> cells were gated in the histogram (2) and checked in the dot plot (1).

For the combined NKG2A<sup>+</sup>NKG2C<sup>+</sup> population (3), a boolean gate was created that combined the cells that were positive for both markers (gates G+H). Expression of NKp44 in this population was plotted in a dot plot and a histogram. NKp44<sup>+</sup> cells were gated in the histogram and checked in the dot plot.

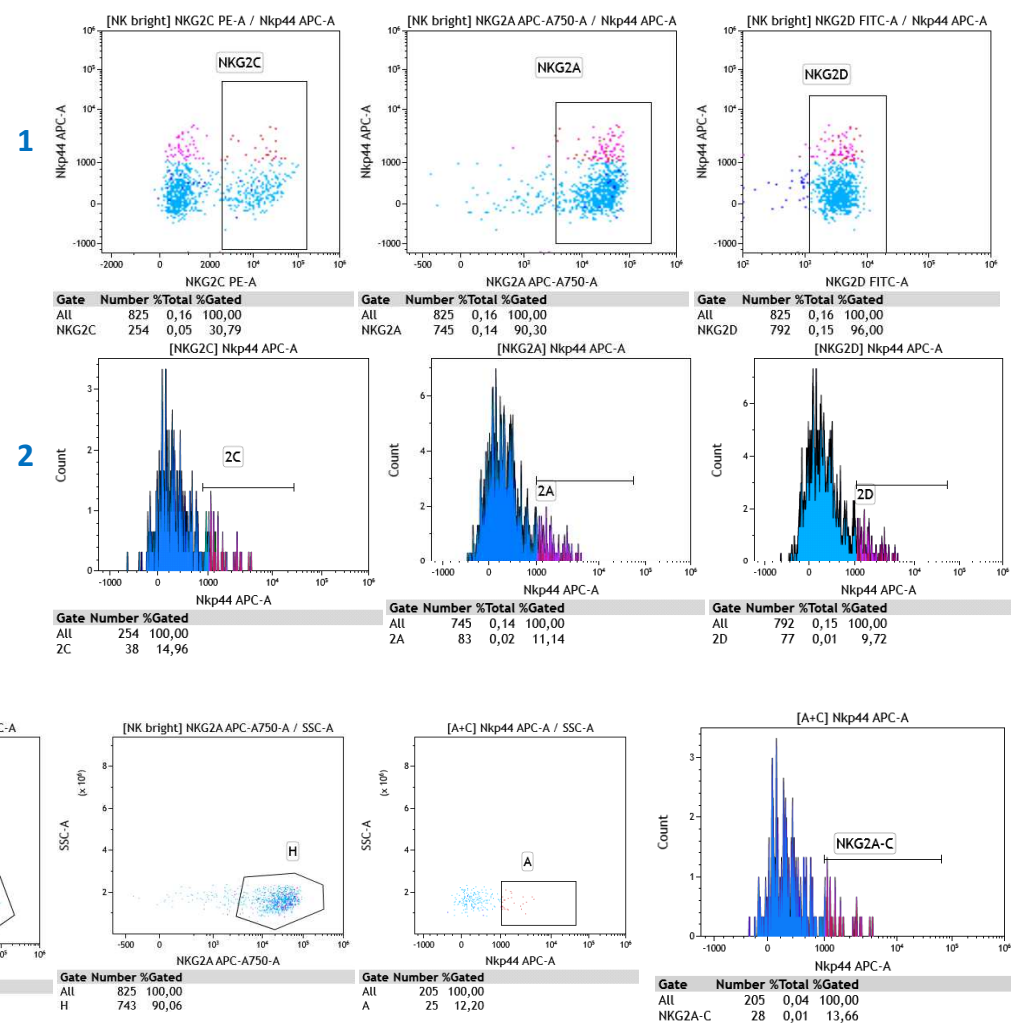

Supplementary file 1: autofluorescence control for the expression of Nkp44 in NK<sup>bright</sup> subpopulations

Autofluorescence determination obtained with a blood sample unstained and processed as the stained blood sample

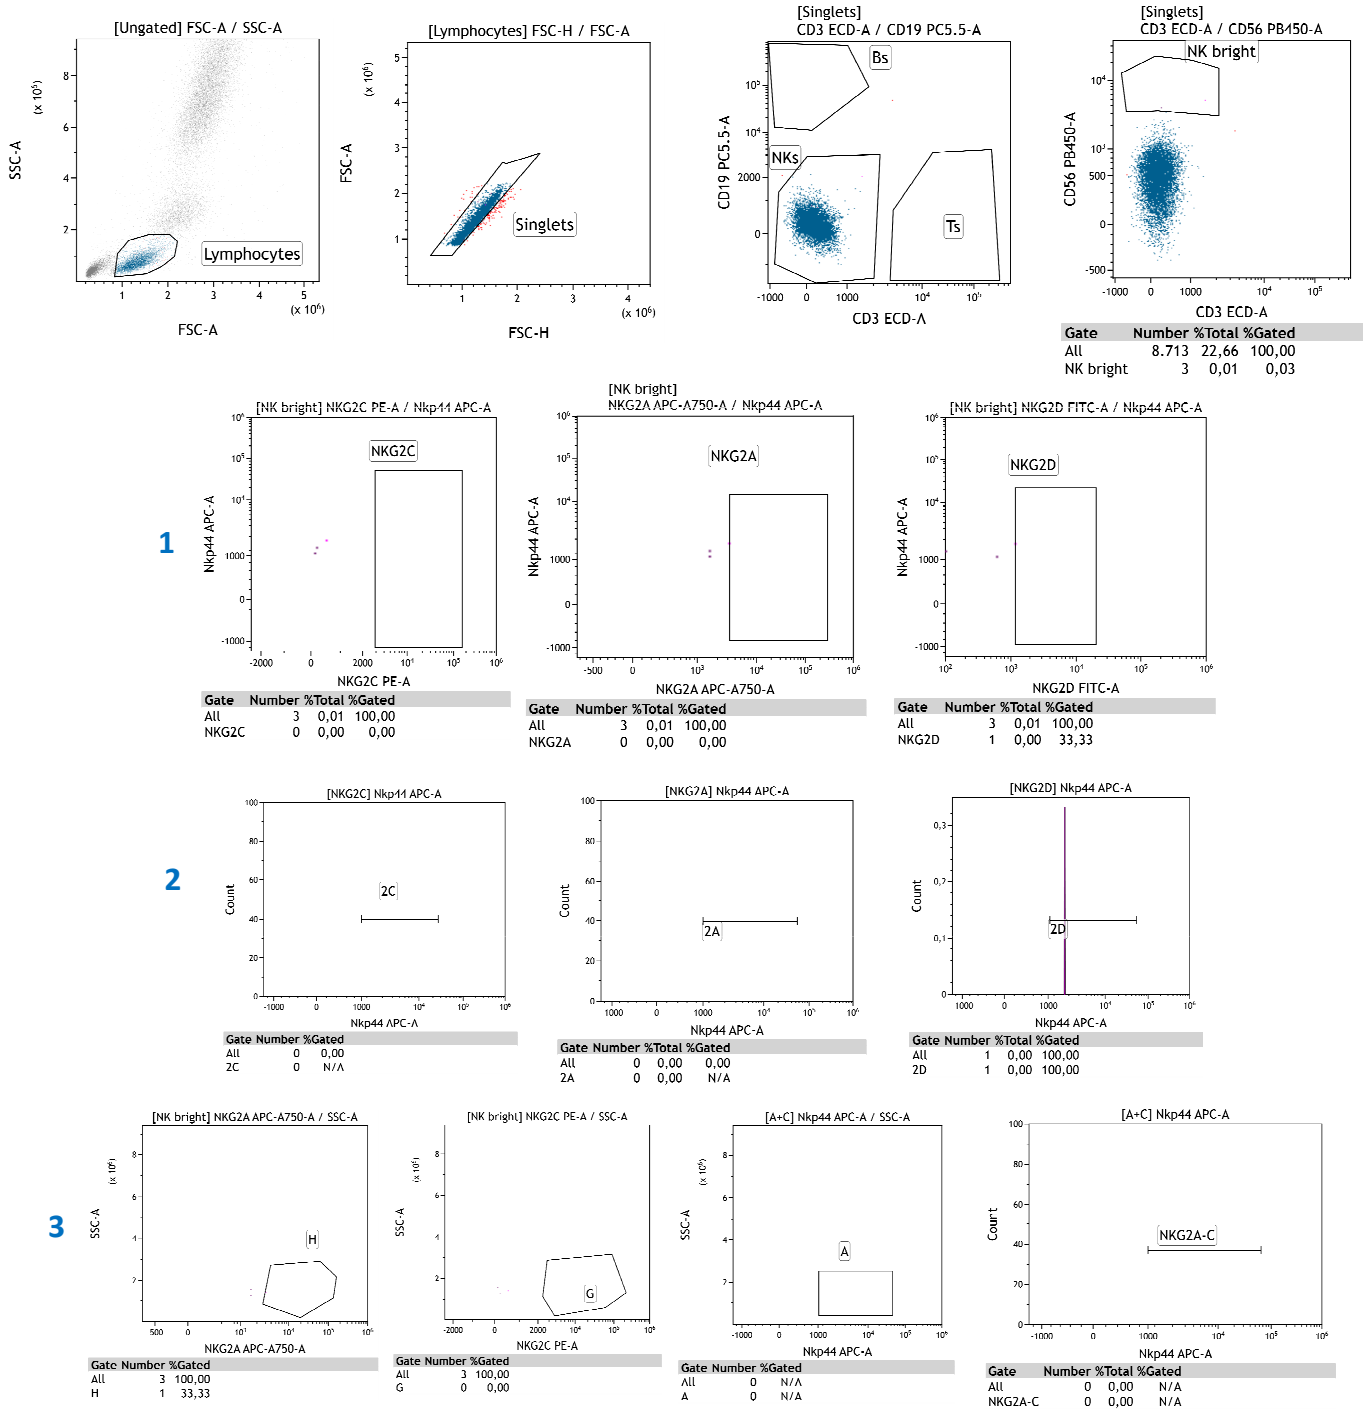

Supplementary file 1: gating strategy for NKG2A<sup>+</sup>CD3<sup>+</sup>CD56<sup>-</sup> and NKG2D<sup>+</sup>CD3<sup>+</sup>CD56<sup>-</sup> populations  
Data presented in the paper

1. NKG2A<sup>+</sup>CD3<sup>+</sup>CD56<sup>-</sup>

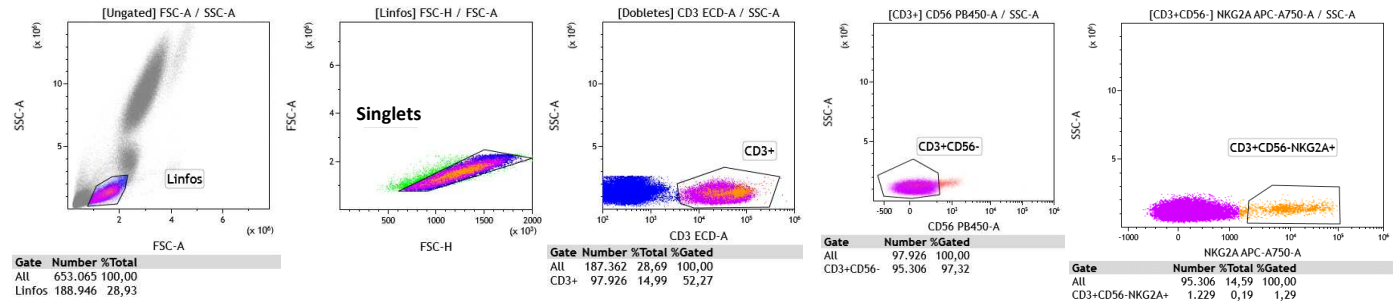

2. NKG2D<sup>+</sup>CD3<sup>+</sup>CD56<sup>-</sup>

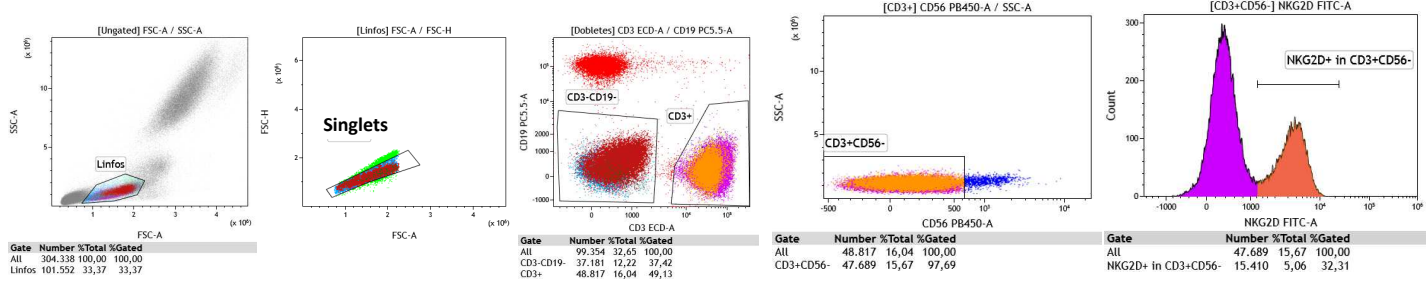

**Supplementary file 1: autofluorescence control for NKG2A<sup>+</sup>CD3<sup>+</sup>CD56<sup>-</sup> and NKG2D<sup>+</sup>CD3<sup>+</sup>CD56<sup>-</sup> populations**

Autofluorescence determination obtained with a blood sample unstained and processed as the stained blood sample

**1. NKG2A<sup>+</sup>CD3<sup>+</sup>CD56<sup>-</sup>**

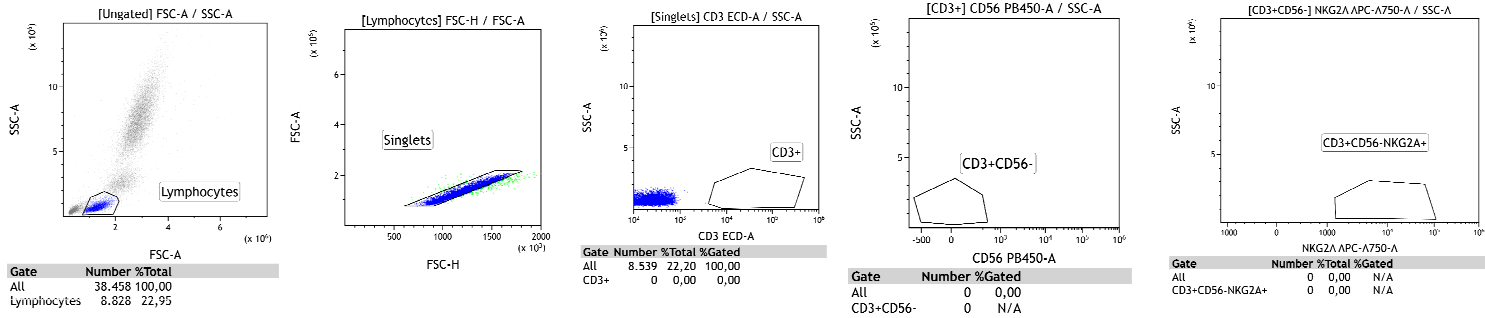

**2. NKG2D<sup>+</sup>CD3<sup>+</sup>CD56<sup>-</sup>**

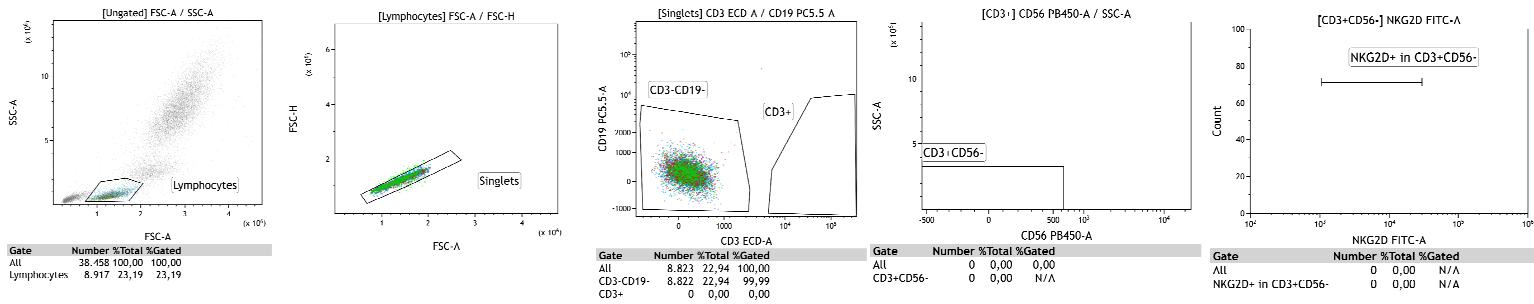

Supplement: Data_Sheet_1.zip [file Data_Sheet_1.zip]
